# Supplementary material for: The effect of psychosocial stress on single mothers’ smoking
Source: PubMed Central journal article supplement (PMC4235024; doi:10.1186/1471-2458-13-1125), 2013-12-05
Supplement: 1471-2458-13-1125-S1.pdf [file 1471-2458-13-1125-S1.pdf]

**Questionnaire: Parental Stress**

The list below shows possible burdens of everyday family life. Please state to what extent do you currently feel distressed with respect to the following issues.

|                                                                     | not at all /<br>not applicable | slightly                 | moderately               | strongly                 | very strongly            |
|---------------------------------------------------------------------|--------------------------------|--------------------------|--------------------------|--------------------------|--------------------------|
| <b>Psychosocial stress due to....</b>                               |                                |                          |                          |                          |                          |
| financial worries                                                   | <input type="checkbox"/>       | <input type="checkbox"/> | <input type="checkbox"/> | <input type="checkbox"/> | <input type="checkbox"/> |
| career situation (includes also unemployment)                       | <input type="checkbox"/>       | <input type="checkbox"/> | <input type="checkbox"/> | <input type="checkbox"/> | <input type="checkbox"/> |
| conflicts with current or former spouse / partner                   | <input type="checkbox"/>       | <input type="checkbox"/> | <input type="checkbox"/> | <input type="checkbox"/> | <input type="checkbox"/> |
| household requirements                                              | <input type="checkbox"/>       | <input type="checkbox"/> | <input type="checkbox"/> | <input type="checkbox"/> | <input type="checkbox"/> |
| permanent availability and commitment to the family                 | <input type="checkbox"/>       | <input type="checkbox"/> | <input type="checkbox"/> | <input type="checkbox"/> | <input type="checkbox"/> |
| sole responsibility for the children                                | <input type="checkbox"/>       | <input type="checkbox"/> | <input type="checkbox"/> | <input type="checkbox"/> | <input type="checkbox"/> |
| a disabled or chronically ill child                                 | <input type="checkbox"/>       | <input type="checkbox"/> | <input type="checkbox"/> | <input type="checkbox"/> | <input type="checkbox"/> |
| child-rearing difficulties / conflicts with the child               | <input type="checkbox"/>       | <input type="checkbox"/> | <input type="checkbox"/> | <input type="checkbox"/> | <input type="checkbox"/> |
| a family member in need of care (e.g. spouse, parents)              | <input type="checkbox"/>       | <input type="checkbox"/> | <input type="checkbox"/> | <input type="checkbox"/> | <input type="checkbox"/> |
| balancing family and job demands (includes also training / studies) | <input type="checkbox"/>       | <input type="checkbox"/> | <input type="checkbox"/> | <input type="checkbox"/> | <input type="checkbox"/> |
| conflicts with other family members (e.g. parents, parents-in-law)  | <input type="checkbox"/>       | <input type="checkbox"/> | <input type="checkbox"/> | <input type="checkbox"/> | <input type="checkbox"/> |
| unwanted living alone / loneliness                                  | <input type="checkbox"/>       | <input type="checkbox"/> | <input type="checkbox"/> | <input type="checkbox"/> | <input type="checkbox"/> |
| little recognition and appreciation of my family work               | <input type="checkbox"/>       | <input type="checkbox"/> | <input type="checkbox"/> | <input type="checkbox"/> | <input type="checkbox"/> |
